# Supplementary material for: A 6-Point TACS Score Predicts In-Hospital Mortality Following Total Anterior Circulation Stroke
Source: PubMed Central journal article supplement — J Clin Neurol. 2016 Sep 30;12(4):407–13. doi: 10.3988/jcn.2016.12.4.407 (PMC5063865; doi:10.3988/jcn.2016.12.4.407), 2016-09-30
Supplement: jcn-12-407-s001.pdf [file jcn-12-407-s001.pdf]

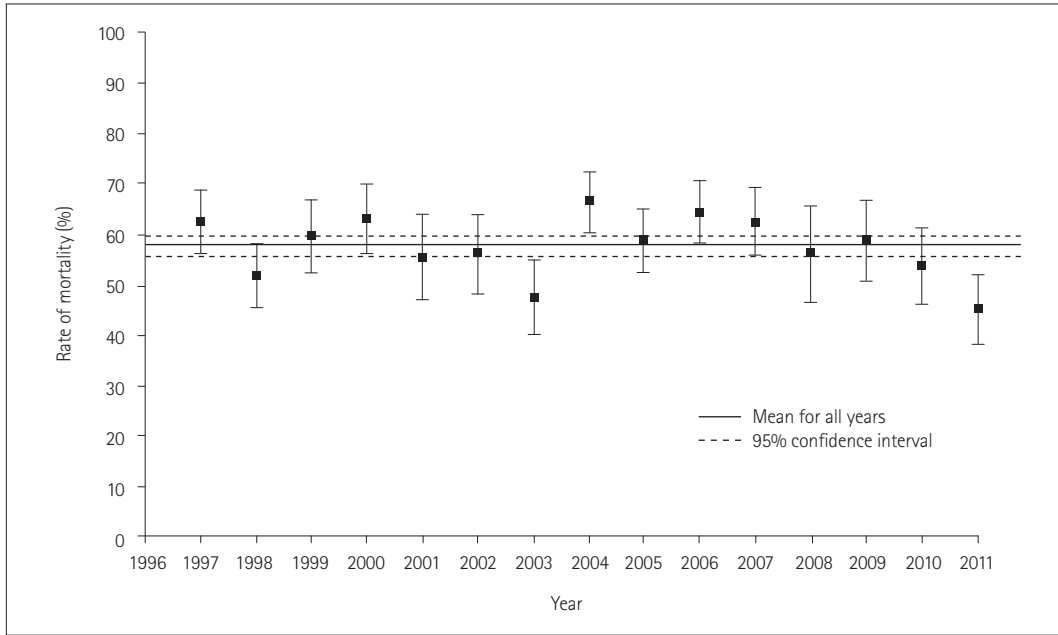

**Supplementary Fig. 1.** Yearly in-hospital mortality rates (95% CI) in comparison to overall corresponding values for TACS (1997–2011). TACS: total anterior circulation stroke.
